# Supplementary figures and images for: A reproducibility study of atomistic line graph neural networks for materials property prediction
Source: Royal Society of Chemistry journal article supplement (doi:10.1039/d4dd00064a), 2024-01-01

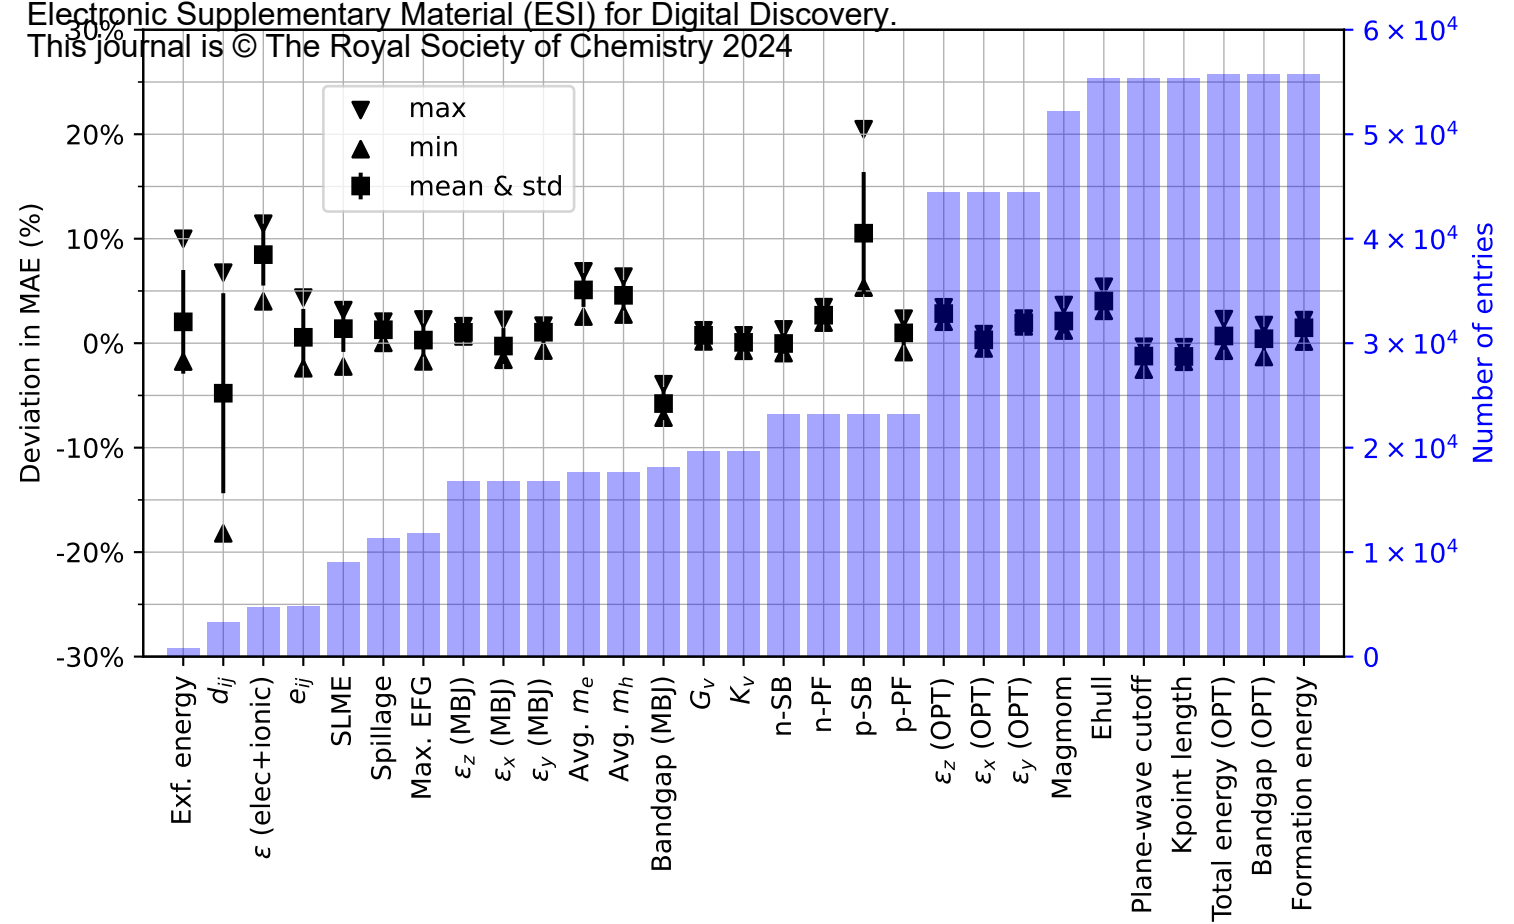

Supplement: d4dd00064a1.pdf [file d4dd00064a1.pdf]
